# Supplementary material for: Putting scales into evolutionary time: the divergence of major scale insect lineages (Hemiptera) predates the radiation of modern angiosperm hosts
Source: PubMed Central journal article supplement (PMC4802209; doi:10.1038/srep23487), 2016-03-22
Supplement: srep23487-s1.pdf [file srep23487-s1.pdf]

## **Electronic Supplementary Materials**

**Putting scales into evolutionary time: the divergence of major scale insect lineages**

**(Hemiptera) predates the radiation of modern angiosperm hosts**

**Isabelle M. Veà <sup>1,2</sup> and David A. Grimaldi <sup>2</sup>**

**<sup>1</sup> Richard Gilder Graduate School, American Museum of Natural History, Central**

**Park West at 79<sup>th</sup> street, New York, NY 10024**

**<sup>2</sup> Division of Invertebrate Zoology, American Museum of Natural History, Central**

**Park West at 79<sup>th</sup> street, New York, NY 10024**

### **Additional Materials and Methods Section:**

(a) Material, DNA isolation and sequencing

Specimens used for molecular sequencing were either preserved in 100%, 70% ethanol, or acetone. Total genomic DNA was extracted using a DNeasy tissue extraction kit (Qiagen, Valencia, CA, USA), following the manufacturer's instructions, except for the following: whole specimens were left in lysis buffer and proteinase K overnight, two elutions of 50 µL were obtained at the end of the extraction, and the cuticle of each specimen was retrieved from the extraction column for slide preparation and identification.

Three nuclear markers were selected based on previous molecular studies on Coccoomorpha: partial 18S, two regions of 28S (D2-3 and D10) and a region of EF-1 alpha. Table S1 provides the list of primers used for the amplification of the four regions as well the references from which they were selected; Genbank accession numbers are available on Table S2. PCR amplifications were performed with a Mastercycler ep Gradient S (Eppendorf) and consisted of 25 µL reactions with Illustra Ready-To-Go PCR beads (GE Healthcare), 1 µL of each primer (x10 dilution) and 2 to 4 µm of DNA template, depending

on the quantity of DNA retrieved from the extraction. For 18S and 28S fragments, PCR conditions followed that of Hardy et al. [1]. The EF-1a fragment was amplified using two sets of primers covering two overlapping regions, which resulted in a fragment of ~ 1080 bp. Conditions for PCR follow that of [2,3]. PCR products were purified using AMPure magnetic beads (Agencourt) and cycle-sequenced with the BigDye 1.1 Terminator Reaction Mix (Applied Biosystems, Inc.) and the same set of primers as PCR reactions. This protocol allowed a faster cycle sequencing program and used less BigDye. Cycle sequenced products were purified using CleanSeq (Agencourt) or ethanol precipitation. Sequencing was performed using an ABI 3730xl DNA Analyzer. Sequences were then compiled and edited using Geneious 5.1.7 [4] and saved in separate Fasta files for further analyses with additional sequences retrieved from Genbank. Sequence alignments were performed using MAFFT [5] through the Geneious platform. Introns from EF-1a were removed after alignment and the gene was partitioned by codon position (1<sup>st</sup> and 2<sup>nd</sup> as one partition and 3<sup>rd</sup> as one partition). The best-fit model of nucleotide substitution for each of the three markers was assessed using jModeltest 2.1.4 [6] and the best models under the Bayesian Information Criterion (BIC) were: TIM3ef+I+G for 18S, TVM+I+G for both 28S regions combined, TPM2+I+G for the partition including the 1<sup>st</sup> and 2<sup>nd</sup> codon positions of EF-1a, and HKY+G for the partition including the 3<sup>rd</sup> codon position of EF-1a. As TIM3ef, TVM and TPM models are not implemented in MrBayes, we used the GTR model for these cases.

**Table S1.** List of primers for each genetic marker and reference used in this study

| Region                   | Primer sequences                                              | Reference |
|--------------------------|---------------------------------------------------------------|-----------|
| 18S (2880-Br)            | CTG GTT GAT CCT GCC AGT AG<br>CCG CGG CTG CTG GCA CCA GA      | [7]       |
| 28S (D2-D3)<br>s3360-28b | GAG AGT TMA ASA GTA CGT GAA AC<br>TCG GAA GGA ACC AGC TAC TA  | [2]       |
| 28S (D9-D10)             | GTA GCC AAA TGC CTC GTC A<br>CAC AAT GA TAG GAA GAG CC        | [8]       |
| EF-1a (2103–2342c)       | CAC ATY AAC ATT GTC GTS ATY GG<br>CTT GAT GAA ATC YCT GTG TCC | [9]       |
| EF-1a (40.6F-52R)        | ATY GAR AAR TTY GAR AAR GAR GC<br>CCD ATY TTR TAN ACR TCY TG  | [10]      |

(b) Taxon sampling and data coverage

Our study used the morphological matrix from Veà and Grimaldi [11], which included 174 morphological characters of male and female and was coded for 69 Recent taxa and 43 extinct taxa. In addition to this sampling, we added nine Recent for in which molecular data were available. These are: *Matsucoccus microcitrices*, *Puto superbus*, *P. albicans*, *Eumargarodes laingi*, *Bambusaspis miliaris*, *Kuwania* sp., *Crypticerya genistae*, *Marchalina hellenica*, and *Phoenicococcus marlatti*.

Our final taxon sampling had varied data coverage as presented in Figure S1.

All fossil taxa had only male morphology coded, while 43 out of the 78 Recent taxa had all three types of

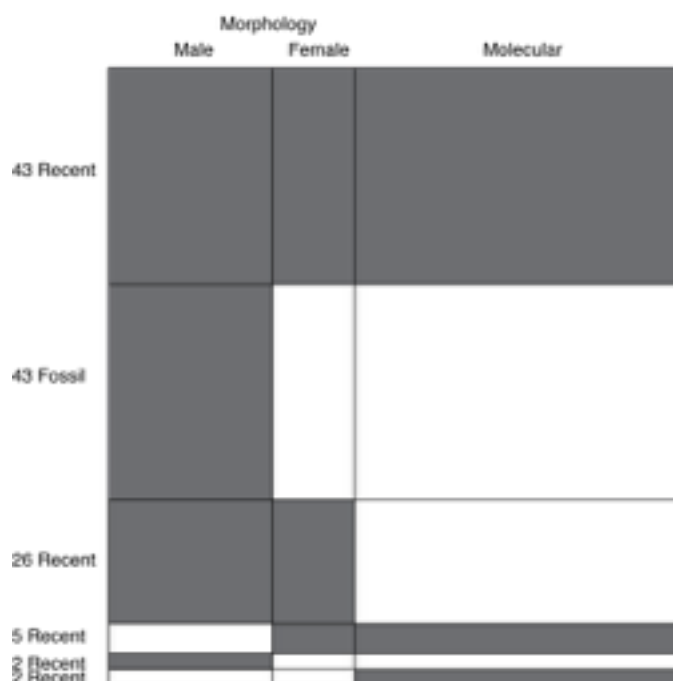

**Figure S1:** Diagram of data coverage for the combined molecular and morphological dataset. Grey areas represent coded data, white areas are missing data.

data (male morphology, female morphology and molecular sequence).

The combined matrices of Recent only and Recent and fossil sets are available as nexus files in GitHub. The original matrix from Veà and Grimaldi [11] is available in Morphobank under Project 1013. The final taxon sampling with GenBank accession numbers for molecular sequences is available in Table S2.

**Table S2.** Recent taxon sampling including GenBank accession numbers for molecular sequences (New accession numbers from this study are in bold), and percentage of scored morphological characters for male and female (Taxa with newly coded morphological characters not in Veá and Grimaldi (2015) with a \*).

|    | Family           | Species for morphology          | Coded char. Male (%) | Coded char. Female (%) | Species for molecular data  | 18S             | 28S D2          | 28S D10         | EF-1a           | Material Depository or collected locality |
|----|------------------|---------------------------------|----------------------|------------------------|-----------------------------|-----------------|-----------------|-----------------|-----------------|-------------------------------------------|
| 1  | Acleridae        | <i>Aclerda arundinariae</i>     | 98.39                | 100                    | <i>Aclerda sp.</i>          | AY426060        | ---             | AY427412        | ---             | NA                                        |
| 2  | Adelgidae        | <i>Adelges tsugae</i>           | 89.52                | 20                     | <i>A.tsugae</i>             | <b>KT199045</b> | ---             | ---             | <b>KT199096</b> | Black Rock Forest, NY, USA                |
| 3  | Adelgidae        | <i>Pineus strobi</i>            | 90.32                | 100                    | <i>P.strobi</i>             | ---             | ---             | ---             | EF073262        | NA                                        |
| 4  | Aphididae        | <i>Acyrtosiphon pisum</i>       | 96.77                | 94                     | <i>A.pisum</i>              | <b>KT199046</b> | ---             | ---             | <b>KT199097</b> | Crete, Greece                             |
| 5  | Aphididae        | <i>Eucallipterus tiliae</i>     | 96.77                | 6                      | <i>E.tiliae</i>             | ---             | ---             | ---             | ---             | NA                                        |
| 6  | Aphididae        | <i>Rhopalosiphum padi</i>       | 64.52                | 100                    | <i>R.padi</i>               | U27825          | ---             | ---             | ---             | NA                                        |
| *7 | Asterolecaniidae | ---                             | ---                  | ---                    | <i>Bambusaspis.miliaris</i> | ---             | GU998966        | ---             | ---             | NA                                        |
| 8  | Beesoniidae      | <i>Beesonia dipteroearpi</i>    | 90.32                | 100                    | <i>B.napiformis</i>         | AY795511        | ---             | ---             | ---             | NA                                        |
| 9  | Besonesiidae     | <i>Gallacoccus secundus</i>     | 88.71                | 100                    | <i>G.heckrothi</i>          | AY795512        | ---             | ---             | ---             | NA                                        |
| 10 | Callipappidae    | <i>Callipappus sp.</i>          | 100                  | 96                     | ---                         | ---             | ---             | ---             | ---             | NA                                        |
| 11 | Cerococcidae     | <i>Cerococcus artemisiae</i>    | 94.35                | 94                     | ---                         | ---             | ---             | ---             | ---             | NA                                        |
| 12 | Coccidae         | <i>Ceroplastes japonicus</i>    | 100                  | 98                     | <i>Ceroplastes sp.</i>      | <b>KT199043</b> | <b>KT199065</b> | ---             | <b>KT199094</b> | AMNH-AMCC 200571                          |
| 13 | Coccidae         | <i>Coccus hesperidum</i>        | 99.19                | 100                    | <i>C.hesperidum</i>         | JX556916        | JX645350        | ---             | GU349853        | NA                                        |
| 14 | Coccidae         | <i>Eulecanium tiliae</i>        | 100                  | 96                     | <i>Eulecanium kunoense</i>  | <b>KT199036</b> | ---             | ---             | <b>KT199091</b> | California State Collection of Arthropods |
| 15 | Coelostomidiidae | <i>Coelostomidia pilosa</i>     | 99.19                | 98                     | <i>C.pilosa</i>             | <b>KT199042</b> | <b>KT199064</b> | ---             | ---             | NZAC02014796                              |
| 16 | Coelostomidiidae | <i>Coelostomidia wairoensis</i> | 99.19                | 100                    | <i>C.wairoensis</i>         | <b>KT199041</b> | <b>KT199063</b> | <b>KT199083</b> | ---             | NZAC02014840                              |

|     | Family            | Species for morphology          | Coded char. Male (%) | Coded char. Female (%) | Species for molecular data | 18S             | 28S D2          | 28S D10         | EF-1a           | Material Depository or collected locality |
|-----|-------------------|---------------------------------|----------------------|------------------------|----------------------------|-----------------|-----------------|-----------------|-----------------|-------------------------------------------|
| 17  | Coelostomidiidae  | <i>Ultracoelostoma assimile</i> | 98.39                | 98                     | ---                        | ---             | ---             | ---             | ---             | NA                                        |
| 18  | Conchaspidae      | <i>Conchaspis lata</i>          | 98.39                | 100                    | ---                        | ---             | ---             | ---             | ---             | NA                                        |
| 19  | Dactylopiidae     | <i>Dactylopius coccus</i>       | 100                  | 100                    | <i>D.coccus</i>            | ---             | ---             | ---             | ---             | NA                                        |
| 20  | Dactylopiidae     | <i>Dactylopius confusus</i>     | 99.19                | 100                    | <i>D.confusus</i>          | <b>KT199039</b> | <b>KT199061</b> | <b>KT199081</b> | <b>KT199093</b> | AMNH-AMCC 200598                          |
| 21  | Diaspididae       | <i>Aonidiella aurantii</i>      | 100                  | 100                    | <i>A.aurantii</i>          | U06475          | JQ434503        | ---             | ---             | NA                                        |
| 22  | Diaspididae       | <i>Chiocaspis salicis</i>       | 100                  | 100                    | <i>C.salicis</i>           | ---             | GU349105        | ---             | ---             | NA                                        |
| 23  | Diaspididae       | <i>Parlatoria oleae</i>         | 99.19                | 100                    | <i>P.oleae</i>             | ---             | GQ325522        | ---             | GQ403835        | NA                                        |
| 24  | Eriococcidae      | <i>Eriococcus coccineus</i>     | 100                  | 100                    | <i>E.coccineus</i>         | AY795336        | EU746831        | ---             | AY795503        | NA                                        |
| 25  | Eriococcidae      | <i>Ovaticoccus agavium</i>      | 100                  | 100                    | <i>O.agavium</i>           | <b>KT199025</b> | ---             | <b>KT199068</b> | <b>KT199086</b> | California State Collection of Arthropods |
| 26  | Eriococcidae      | <i>Tanyscelis verrucula</i>     | 87.9                 | 98                     | <i>T.verrucula</i>         | EU746803        | EU746839        | ---             | EU746899        | NA                                        |
| 27  | Eriococidae       | <i>Eriococcus buxi</i>          | 100                  | 98                     | <i>E.buxi</i>              | AY795513        | ---             | ---             | AY795493        | NA                                        |
| 28  | Kermesidae        | <i>Kermes quercus</i>           | 96.77                | 98                     | <i>K.quercus</i>           | ---             | JX436145        | ---             | ---             | NA                                        |
| 29  | Kermesidae        | <i>Kermes</i> sp.               | 94.35                | 0                      | ---                        | ---             | ---             | ---             | ---             | NA                                        |
| 30  | Kerriidae         | <i>Tachardina aurantiaca</i>    | 100                  | 100                    | ---                        | ---             | ---             | ---             | ---             | NA                                        |
| *31 | Kuwaniidae        | ---                             | 0                    | 0                      | <i>Kuwania</i> sp.         | <b>KT199032</b> | <b>KT199055</b> | <b>KT199074</b> | ---             | Tsukuba, Ibaraki, Japan                   |
| 32  | Kuwaniidae        | <i>Neosteingelia texana</i>     | 100                  | 100                    | <i>N.texana</i>            | <b>KT199028</b> | <b>KT199052</b> | <b>KT199071</b> | ---             | AMNH-AMCC 200597                          |
| 33  | Lecanodiaspididae | <i>Lecanodiaspis baculifera</i> | 91.13                | 100                    | <i>L.baculifera</i>        | <b>KT199031</b> | <b>KT199054</b> | <b>KT199073</b> | <b>KT199089</b> | California State Collection of Arthropods |

|     | Family        | Species for morphology            | Coded char. Male (%) | Coded char. Female (%) | Species for molecular data       | 18S             | 28S D2          | 28S D10         | EF-1a           | Material Depository or collected locality |
|-----|---------------|-----------------------------------|----------------------|------------------------|----------------------------------|-----------------|-----------------|-----------------|-----------------|-------------------------------------------|
| *34 | Marchalinidae | <i>Marchalina hellenica</i>       | 0                    | 100                    | <i>M.hellenica</i>               | <b>KT199030</b> | EU087818        | ---             | <b>KT199088</b> | AMNH-AMCC 200564                          |
| 35  | Margarodidae  | <i>Dimargarodes meridionalis</i>  | 97.58                | 98                     | ---                              | ---             | ---             | ---             | ---             | NA                                        |
| 36  | Margarodidae  | <i>Dimargarodes tanganyicus</i>   | 98.39                | 98                     | ---                              | ---             | ---             | ---             | ---             | NA                                        |
| *37 | Margarodidae  | <i>Eumargarodes laingi</i>        | 0                    | 98                     | <i>E.laingi</i>                  | <b>KT199035</b> | <b>KT199058</b> | <b>KT199078</b> | ---             | AMNH-AMCC 200602                          |
| 38  | Margarodidae  | <i>Hetermargarodes americanus</i> | 100                  | 98                     | ---                              | ---             | ---             | ---             | ---             | NA                                        |
| 39  | Margarodidae  | <i>Porphyrophora hamelii</i>      | 100                  | 100                    | ---                              | ---             | ---             | ---             | ---             | NA                                        |
| *40 | Matsucoccidae | ---                               | ---                  | ---                    | <i>Matsucoccus microcitrices</i> | KF053072        | KF040554        | KF040584        | ---             | NA                                        |
| 41  | Matsucoccidae | <i>Matsucoccus bisetosus</i>      | 81.45                | 100                    | ---                              | ---             | ---             | ---             | ---             | NA                                        |
| 42  | Matsucoccidae | <i>Matsucoccus feytaudi</i>       | 97.58                | 100                    | ---                              | ---             | ---             | ---             | ---             | NA                                        |
| 43  | Matsucoccidae | <i>Matsucoccus josephi</i>        | 100                  | 100                    | ---                              | ---             | ---             | ---             | ---             | NA                                        |
| 44  | Matsucoccidae | <i>Matsucoccus matsumurae</i>     | 95.97                | 100                    | <i>Matsucoccus sp.</i>           | <b>KT199029</b> | <b>KT199053</b> | <b>KT199072</b> | ---             | AMNH-AMCC 200591                          |
| *45 | Monophlebidae | <i>Crypticerya genistae</i>       | 0                    | 98                     | <i>C.genistae</i>                | <b>KT199040</b> | <b>KT199062</b> | <b>KT199082</b> | ---             | AMNH-AMCC 200599                          |
| 46  | Monophlebidae | <i>Drosicha corpulenta</i>        | 98.39                | 100                    | <i>D.corpulenta</i>              | <b>KT199038</b> | <b>KT199060</b> | <b>KT199080</b> | <b>KT199092</b> | Tsukuba, Ibaraki, Japan                   |
| 47  | Monophlebidae | <i>Drosicha dalbergiae</i>        | 99.19                | 100                    | ---                              | ---             | ---             | ---             | ---             | NA                                        |
| 48  | Monophlebidae | <i>Drosicha pinicola</i>          | 99.19                | 100                    | <i>D.pinicola</i>                | <b>KT199037</b> | <b>KT199059</b> | <b>KT199079</b> | ---             | Tsukuba, Ibaraki, Japan                   |
| 49  | Monophlebidae | <i>Gigantococcus maximus</i>      | 98.39                | 100                    | <i>G.maximus</i>                 | EU087721        | ---             | EU087835        | ---             | NA                                        |

|     | Family            | Species for morphology                              | Coded char. Male (%) | Coded char. Female (%) | Species for molecular data | 18S             | 28S D2          | 28S D10         | EF-1a           | Material Depository or collected locality |
|-----|-------------------|-----------------------------------------------------|----------------------|------------------------|----------------------------|-----------------|-----------------|-----------------|-----------------|-------------------------------------------|
| 50  | Monophlebidae     | <i>Icerya purchasi</i>                              | 100                  | 98                     | <i>I.purchasi</i>          | <b>KT199034</b> | <b>KT199057</b> | <b>KT199077</b> | AY429408        | AMNH-AMCC 200576                          |
| 51  | Monophlebidae     | <i>Icerya seychellarum</i>                          | 100                  | 100                    | <i>I.seychellarum</i>      | <b>KT199033</b> | ---             | <b>KT199076</b> | <b>KT199090</b> | Nakagamigun, Okinawa, Japan               |
| 52  | Monophlebidae     | <i>Palaeococcus fuscipennis</i>                     | 97.58                | 98                     | ---                        | ---             | ---             | ---             | ---             | NA                                        |
| 53  | Ortheziidae       | <i>Insignorthezia insignis</i>                      | 96.77                | 100                    | <i>Insignorthezia sp.</i>  | HQ893784        | <b>KT199056</b> | <b>KT199075</b> | ---             | AMNH-AMCC 192453                          |
| 54  | Ortheziidae       | <i>Newsteadia floccosa</i>                          | 99.19                | 100                    | <i>N.floccosa</i>          | <b>KT199027</b> | <b>KT199051</b> | <b>KT199070</b> | ---             | MNHN14795                                 |
| 55  | Ortheziidae       | <i>Orthezia urticae</i>                             | 99.19                | 100                    | <i>Orthezia sp.</i>        | <b>KT199026</b> | <b>KT199050</b> | <b>KT199069</b> | <b>KT199087</b> | AMNH-AMCC                                 |
| 56  | Ortheziidae       | <i>Praelongorthezia praelonga</i>                   | 96.77                | 98                     | ---                        | ---             | ---             | ---             | ---             | NA                                        |
| 57  | Phenacoleachiidae | <i>Phenacoleachia species a</i>                     | 99.19                | 100                    | ---                        | ---             | ---             | ---             | ---             | NA                                        |
| 58  | Phenacoleachiidae | <i>Phenacoleachia species b</i>                     | 97.58                | 0                      | ---                        | ---             | ---             | ---             | ---             | NA                                        |
| *59 | Phoenicococcidae  | <i>Phoenicococcus marlatti</i>                      | 0                    | 100                    | <i>P.marlatti</i>          | <b>KT199024</b> | <b>KT199049</b> | ---             | ---             | AMNH-AMCC 200592                          |
| 60  | Pityococcidae     | <i>Pityococcus sp.</i>                              | 99.19                | 100                    | ---                        | ---             | ---             | ---             | ---             | NA                                        |
| 61  | Pseudococcidae    | <i>Antonina graminis (female)/ A. crawii (male)</i> | 99.19                | 100                    | <i>A.graminis</i>          | <b>KT199044</b> | <b>KT199060</b> | <b>KT199084</b> | <b>KT199095</b> | AMNH-AMCC 200595                          |
| 62  | Pseudococcidae    | <i>Ceroputo pilosellae</i>                          | 98.39                | 96                     | ---                        | ---             | ---             | ---             | ---             | NA                                        |
| 63  | Pseudococcidae    | <i>Coccidohystrix insolitus</i>                     | 96.77                | 100                    | ---                        | ---             | ---             | ---             | ---             | NA                                        |
| 64  | Pseudococcidae    | <i>Dysmicoccus grassii</i>                          | 98.39                | 100                    | <i>D.alazon</i>            | JF965398        | JQ651254        | JF965409        | AY427279        | NA                                        |
| 65  | Pseudococcidae    | <i>Ferrisia virgata</i>                             | 99.19                | 98                     | <i>F.virgata</i>           | AY426079        | AY179468        | AY427373        | ---             | NA                                        |



|     | Family         | Species for morphology          | Coded char. Male (%) | Coded char. Female (%) | Species for molecular data | 18S             | 28S D2          | 28S D10         | EF-1a           | Material Depository or collected locality |
|-----|----------------|---------------------------------|----------------------|------------------------|----------------------------|-----------------|-----------------|-----------------|-----------------|-------------------------------------------|
| 66  | Pseudococcidae | <i>Planococcus citri</i>        | 100                  | 100                    | <i>P.citri</i>             | JF965405        | ---             | AY427375        | AY427264        | NA                                        |
| 67  | Pseudococcidae | <i>Pseudococcus longispinus</i> | 98.39                | 199                    | <i>P.longispinus</i>       | <b>KT199023</b> | <b>KT199048</b> | AY427400        | <b>KT199085</b> | New York, NY, USA                         |
| 68  | Pseudococcidae | <i>Pseudococcus maritimus</i>   | 76.61                | 100                    | <i>P.maritimus</i>         | AY426043        | AY427312        | AY427384        | AY427265        | NA                                        |
| *69 | Putoidae       | ---                             | ---                  | ---                    | <i>P.albicans</i>          | AY426051        | AY427838        | AY427408        | AY427301        | NA                                        |
| 70  | Putoidae       | <i>Puto kozstarabi</i>          | 98.39                | 100                    | ---                        | ---             | ---             | ---             | ---             | NA                                        |
| 71  | Putoidae       | <i>Puto mexicanus</i>           | 95.97                | 100                    | ---                        | ---             | ---             | ---             | ---             | NA                                        |
| *72 | Putoidae       | <i>Puto superbus</i>            | 0                    | 100                    | <i>P.superbus</i>          | <b>KT199022</b> | <b>KT199047</b> | <b>KT199067</b> | ---             | Katowice Forest Park, Poland              |
| 73  | Putoidae       | <i>Puto yuccae</i>              | 100                  | 100                    | <i>P.yuccae</i>            | AY426052        | AY427339        | ---             | ---             | NA                                        |
| 74  | Steingeliidae  | <i>Steingelia gorodetskia</i>   | 99.19                | 100                    | ---                        | ---             | ---             | ---             | ---             | NA                                        |
| 75  | Stictococcidae | <i>Stictococcus vayssievei</i>  | 88.71                | 98                     | <i>S.sjostedti</i>         | AY795509        | ---             | ---             | AY795494        | NA                                        |
| 76  | Stigmacoccidae | <i>Stigmacoccus asper</i>       | 99.19                | 98                     | ---                        | ---             | ---             | ---             | ---             | NA                                        |
| 77  | Xylococcidae   | <i>Xylococcus betulae</i>       | 99.19                | 100                    | ---                        | ---             | ---             | ---             | ---             | NA                                        |
| 78  | Xylococcidae   | <i>Xylococcus japonicus</i>     | 99.19                | 98                     | ---                        | ---             | ---             | ---             | ---             | NA                                        |

### (c) Divergence time analyses

All analyses were run in MrBayes 3.2.6 through the Cipres Science Gateway Portal [12]. Four replicates of 10 to 80 million generations were run at an initial temperature of 0.2 for preliminary analyses (non-clock and strict-clock) and 0.1 for the divergence time estimate analyses. Convergence was considered achieved when the average standard deviation of split frequency was below 0.05. All trees were summarized using the command `sumt` in MrBayes with the option `contype=allcompat`. We chose to summarize the trees using all compatibility method because of the amount of missing data (fossils and a number of Recent terminals do not have molecular sequences) that tend to reduce significantly the posterior probabilities.

#### *Preliminary analyses*

A non-clock and strict-clock analyses were first performed with *Coccoidea* as a topology constraint in order to define prior values for the IGR model and the clock rate. For details on command lines, see the codebook available publicly in Github (<https://github.com/zourloubidou/Coccomorpha-divergence-time.md>).

#### *IGR model*

The non-clock and strict-clock topologies were used as inputs to determine the prior distribution values for the IGR model and clock rate using the R script from Ronquist et al. [13].

| Mean TH  | Variance | sigma       | age of root in million years | #substitution per million year | mu               | Median variance branch length | parameter for igrvar |
|----------|----------|-------------|------------------------------|--------------------------------|------------------|-------------------------------|----------------------|
| 0.560715 | 0.002692 | 0.051884487 | 240                          | 0.002336313                    | -6.06052744<br>7 | 0.03899406                    | 25.64493156          |

#### *Divergence-time estimate analyses*

Both node-dating and tip-dating analyses used a relaxed clock following the IGR model from Ronquist et al. [13]. For the node-dating analyses, we used the Recent only dataset (fossil terminals were defined in a variable using the command line “taxset fossils =” and excluded from prior to analysis using the command line “remove fossils;”), for which node age priors were set for the root, the ingroup and 10 families following an off set exponential distribution. All details on node calibration can be found in Table S3. For the tip-dating method, we used the Recent+fossil dataset and performed fixed prior ages on all fossil terminals (Table S4 for details on ages) as well as an offset exponential distribution for the root prior. In order to assess if any of node prior and the root prior distribution (either in the node-dating analysis or the tip-dating where a prior distribution was defined for the root) could influence the age estimates in MrBayes, we performed various analyses with both node-dating and tip-dating approaches as follow:

- Node-dating method: 10 additional node-dating analyses were performed using all node priors and excluding one node prior at a time, as well as one analysis excluding the root prior, and one analysis changing the distribution of the root to lognormal (mean=240, SD=10).
- Tip-dating method: two additional analyses were performed with for the first one excluding the root prior, and the second changing the root prior distribution to lognormal (mean=240, SD=10).

All topologies with age estimates resulting from these analyses are available in TreeBASE (temporary link for reviewers: <http://purl.org/phylo/treebase/phyloids/study/TB2:S17496?x-access-code=4cff04a26ac567ac00b91ec3451e380d&format=html>)

**Table S3.** Node calibration priors used for the node-calibrated analyses

| Node | Family       | Age prior          | Fossil taxon                                       | Reference | Remarks                                                                                                                                                                                                                                                                                                                                    |
|------|--------------|--------------------|----------------------------------------------------|-----------|--------------------------------------------------------------------------------------------------------------------------------------------------------------------------------------------------------------------------------------------------------------------------------------------------------------------------------------------|
| 1    | root         | offsetexp(240,250) | <i>Vosegus triassicus</i> Szwedo & Nel             | [14]      | The minimum age of the root was defined based on the wing impression of the oldest Aphidomorpha described in a rock deposit from the Vosges, France (early Anisian, Middle Triassic, ~240 Ma).                                                                                                                                             |
| 2    | Coccomorpha  | offsetexp(140,240) | <i>Eomatsucoccus casei</i> Koteja                  | [15]      | This calibration is based on the oldest definitive Coccoidea, belonging to the extant family Matsuoccidae. The minimum age was defined at 140 Ma as MrBayes did not allow to perform the analysis when the minimum age was set at the same age as a more inclusive node.                                                                   |
| 3    | Coccidae     | offsetexp(98,110)  | <i>Rosahendersonia prisca</i> Veá & Grimaldi       | [11]      | <i>Rosahendersonia prisca</i> was described from Burmese amber and is the oldest record of Coccidae. <i>R. prisca</i> is in the total evidence analysis taxon sampling.                                                                                                                                                                    |
| 4    | Diaspididae  | offsetexp(50,100)  | <i>Normarkicoccus cambayae</i>                     | [11]      | <i>Normarkicoccus</i> sp. was described in the Diaspididae based on multiple characters, despite the presence of some plesiomorphic features such as the absence of a long penial sheath. This is the oldest Diaspididae fossil record from Cambay amber. <i>Normarkicoccus cambayae</i> is in the total evidence analysis taxon sampling. |
| 5    | Kermesidae   | offsetexp(45,100)  | <i>Sucinikermes kulickae</i> Koteja                | [16]      | <i>Sucinikermes</i> was described in Baltic amber based on an instar nymph and was assigned to the Kermesidae based on known living Kermesidae instars. <i>Sucinikermes kulickae</i> is not the total evidence analysis taxon sampling.                                                                                                    |
| 6    | Kuwaniidae   | offsetexp(45,100)  | <i>Hoffeinsia foldi</i> Koteja                     | [17]      | <i>Hoffeinsia</i> sp. was described in Baltic amber. <i>Hoffeinsia</i> is not in the total evidence analysis taxon sampling.                                                                                                                                                                                                               |
| 7    | Margarodidae | offsetexp(50,100)  | <i>Heteromargarodes hukamsinghi</i> Veá & Grimaldi | [11]      | <i>Heteromargarodes</i> is a living genus, for which the only fossil species of the family was described in Cambay amber. <i>Heteromargarodes hukamsinghi</i> is in the total evidence analysis taxon sampling.                                                                                                                            |

|    |                |                    |                                                |                                               |                                                                                                                                                                                                                                                                                                                                            |
|----|----------------|--------------------|------------------------------------------------|-----------------------------------------------|--------------------------------------------------------------------------------------------------------------------------------------------------------------------------------------------------------------------------------------------------------------------------------------------------------------------------------------------|
| 8  | Matsucoccidae  | offsetexp(135,140) | <i>Eomatsucoccus casei</i> Koteja              | [15]                                          | <i>Eomatsucoccus casei</i> is the oldest definitive Coccoidea described in the fossil record. Is in the total evidence analysis taxon sampling.                                                                                                                                                                                            |
| 9  | Ortheziidae    | offsetexp(135,140) | <i>Crethorthezia hammanaica</i> Koteja & Azar  | [18]                                          | <i>Crethorthezia hammanaica</i> was described in Lebanese amber based on a macropterous male. <i>C. hammanaica</i> is in the total evidence analysis taxon sampling.                                                                                                                                                                       |
| 10 | Pseudococcidae | offsetexp(135,140) | <i>Williamsicoccus megalops</i> Veá & Grimaldi | [11]                                          | <i>Williamsicoccus</i> was described in Lebanese amber based on a macropterous male. <i>Williamsicoccus megalops</i> is in the total evidence analysis taxon sampling.                                                                                                                                                                     |
| 11 | Putoidae       | offsetexp(45,100)  | Undescribed <i>Puto</i> sp. in Baltic amber    | Koteja's amber collection, Silesia University | Definitive <i>Puto</i> males are found in Baltic ambers but yet to be described.                                                                                                                                                                                                                                                           |
| 12 | Xylococcidae   | offsetexp(135,140) | <i>Baisococcus victoriae</i> Koteja            | [19]                                          | <i>Baisococcus victoriae</i> was described from a rock impression of a macropterous male and was subsequently classified in the Xylococcidae family by Koteja (2000). However, based on the state of conservation and the limited number of characters observable on the specimen, this taxon was not used in the total evidence analysis. |

**Table S4.** Extinct taxon sampling with age priors used in the total evidence divergence time analyses and % of coded characters. Fossil deposits abbreviations: Al: Alaska; Bu: Burmese, Le: Lebanese, Ba: Baltic; Bi: Bitterfield; Ca: Canada; Cb: Cambay, Ch: Charentes; NJ: New Jersey; Ta: Taimyr.

|    | Family           | Taxon                                            | Fossil deposit | Fixed age priors | Age prior with uniform distribution | % of coded characters |
|----|------------------|--------------------------------------------------|----------------|------------------|-------------------------------------|-----------------------|
| 1  | Albicoccidae     | <i>Albicoccus dimai</i> Koteja                   | Bu             | 98               | 98; 99.5                            | 35.63                 |
| 2  | Apticoccidae     | <i>Apticoccus minutus</i> Koteja & Azar          | Le             | 135              | 120;135                             | 45.98                 |
| 3  | Apticoccidae     | <i>Apticoccus longitenuis</i> Koteja & Azar      | Le             | 135              | 120;135                             | 43.68                 |
| 4  | Apticoccidae     | <i>Apticoccus fortis</i> Koteja & Azar           | Le             | 135              | 120;135                             | 45.4                  |
| 5  | Arnoldidae       | <i>Arnoldus capitatus</i> Koteja                 | Ba             | 45               | 43;48.5                             | 43.68                 |
| 6  | Burmacoccidae    | <i>Burmacoccus danyi</i> Koteja                  | Bu             | 98               | 98; 99.5                            | 39.08                 |
| 7  | Coccidae         | <i>Rosahendersonia prisca</i> Veá & Grimaldi     | Bu             | 98               | 98; 99.5                            | 44.83                 |
| 8  | Diaspididae      | <i>Normarkicoccus cambayae</i> Veá & Grimaldi    | Cb             | 50               | 50;52                               | 38.5                  |
| 9  | Electrococcidae  | <i>Electrococcus canadensis</i> Beardsley        | Ca             | 100              | 95;105                              | 48.8                  |
| 10 | Electrococcidae  | <i>Turonicoccus beardsleyi</i> Koteja            | NJ             | 92               | 88;94                               | 32.18                 |
| 11 | Eriococcidae     | <i>Kuenowicoccus piatrzeniukae</i> Koteja        | Ba             | 45               | 43;48.5                             | 47.7                  |
| 12 | Grimaldiellidae  | <i>Grimaldiella gregaria</i> Koteja              | NJ             | 92               | 88;94                               | 56.9                  |
| 13 | Grohnidae        | <i>Grohnus eichmanni</i> Koteja                  | Ba             | 45               | 43;48.5                             | 47.7                  |
| 14 | Hodgsonicoccidae | <i>Hodgsonicoccus patefactus</i> Veá & Grimaldi  | Le             | 135              | 120;135                             | 51.15                 |
| 15 | Incertae sedis   | <i>Marmyan barbarae</i> Koteja                   | Bu             | 98               | 98; 99.5                            | 29.89                 |
| 16 | Incertae sedis   | <i>Pedicellicoccus marginatus</i> Veá & Grimaldi | Bu             | 98               | 98; 99.5                            | 43.68                 |
| 17 | Incertae sedis   | <i>Undescribed fossil from French amber</i>      | Ch             | 100              | 95;100                              | 28.16                 |
| 18 | Incertae sedis   | <i>Magnilens glaesaria</i> Veá & Grimaldi        | Bu             | 98               | 98; 99.5                            | 41.38                 |
| 19 | Incertae sedis   | <i>Alacrena peculiaris</i> Veá & Grimaldi        | Bu             | 98               | 98; 99.5                            | 41.38                 |
| 20 | Incertae sedis   | <i>Xiphos vani</i> Veá & Grimaldi                | Le             | 135              | 120;135                             | 51.77                 |
| 21 | Inkaidae         | <i>Inka minuta</i> Koteja                        | Ta             | 85               | 80;90                               | 57.47                 |
| 22 | Jersicoccidae    | <i>Jersicoccus kurthi</i> Koteja                 | NJ             | 92               | 88;94                               | 31.03                 |
| 23 | Kozariidae       | <i>Kozarius achronus</i> Veá & Grimaldi          | Bu             | 98               | 98; 99.5                            | 54.6                  |
| 24 | Kozariidae       | <i>Kozarius perpetuus</i> Veá & Grimaldi         | Bu             | 98               | 98; 99.5                            | 55.17                 |

|    |                  |                                                    |    |     |          |       |
|----|------------------|----------------------------------------------------|----|-----|----------|-------|
| 25 | Kukaspidae       | <i>Kukaspis usingeri</i> Koteja & Poinar           | Al | 100 | 95;100   | 47.12 |
| 26 | Labiococcidae    | <i>Solicoccus nascimbenei</i> Koteja               | NJ | 92  | 88;94    | 47.12 |
| 27 | Lebanococcidae   | <i>Lebanococcus longiventris</i> Koteja & Azar     | Le | 135 | 120;135  | 44.83 |
| 28 | Margarodidae     | <i>Heteromargarodes hukamsinghi</i> Veá & Grimaldi | Cb | 50  | 50;52    | 41.95 |
| 29 | Matsucoccidae    | <i>Eomatsucoccus casei</i> Koteja                  | NJ | 92  | 88;94    | 36.78 |
| 30 | Ortheziidae      | <i>Cretorthezia hammanaica</i> Koteja and Azar     | Le | 135 | 120;135  | 35.63 |
| 31 | Ortheziidae      | <i>Palaeonewstedia huaniae</i> Koteja              | Ba | 45  | 43;48.5  | 51.72 |
| 32 | Ortheziidae      | <i>Protorthezia aurea</i> Koteja                   | Ba | 45  | 43;48.5  | 44.83 |
| 33 | Pennygullaniidae | <i>Pennygullania electrina</i> Koteja & Azar       | Le | 135 | 120;135  | 43.1  |
| 34 | Pityococcidae    | <i>Pityococcus moniliformalis</i> Veá & Grimaldi   | Ba | 45  | 43;48.5  | 64.37 |
| 35 | Pseudococcidae   | <i>Williamsicoccus megalops</i> Veá & Grimaldi     | Le | 135 | 120;135  | 43.68 |
| 36 | Pseudococcidae   | <i>Gilderius eukrinops</i> Veá & Grimaldi          | Bu | 98  | 98; 99.5 | 46.55 |
| 37 | Putoidae         | <i>Palaeotupo danielae</i> Koteja & Azar           | Le | 135 | 120;135  | 45.4  |
| 38 | Serafinidae      | <i>Serafinus acupiterus</i> Koteja                 | Ba | 45  | 43;48.5  | 57.47 |
| 39 | Steingeliidae    | <i>Palaeosteingelia acraí</i> Koteja & Azar        | Le | 135 | 120;135  | 54.6  |
| 40 | Steingeliidae    | <i>Steingelia cretacea</i> Koteja                  | NJ | 92  | 88;94    | 52.3  |
| 41 | Weitschatidae    | <i>Weitschatus stigmatus</i> Koteja                | Ba | 45  | 43;48.5  | 64.94 |
| 42 | Weitschatidae    | <i>Pseudoweitschatus audebertis</i> Veá & Grimaldi | Bu | 98  | 98; 99.5 | 52.3  |
| 43 | Xylococcidae     | <i>Xylococcus grabenhorstii</i> Koteja             | Bi | 45  | 40;50    | 52.87 |

### *Ages and LTT plots*

For a quick overview of age-estimate differences among the analyses, we obtained lineage through time (LTT) plots in R version 3.1.2 (2014-10-31) [20]. For all tip-dating analyses,

fossil terminals were pruned prior to obtaining the LTT plots so that they could be comparable to the node-dated topologies. Age estimates for different analyses were also plotted for comparison using the ggplot2 package.

Command lines and packages used to obtain the plots are available in Github (<https://github.com/zourlobidou/Coccomorpha-divergence-time/blob/master/Plots.md>- for reviewer access, first login at <http://www.github.com> with username: Journalreviewer, password: Githubforreview2015).

### **Additional results section**

(a) Dataset and output files

A README file is available in GitHub that summarizes all datasets and intermediate results made available to the reader.



(b) Tip-dating analysis using Ronquist et al., 2012

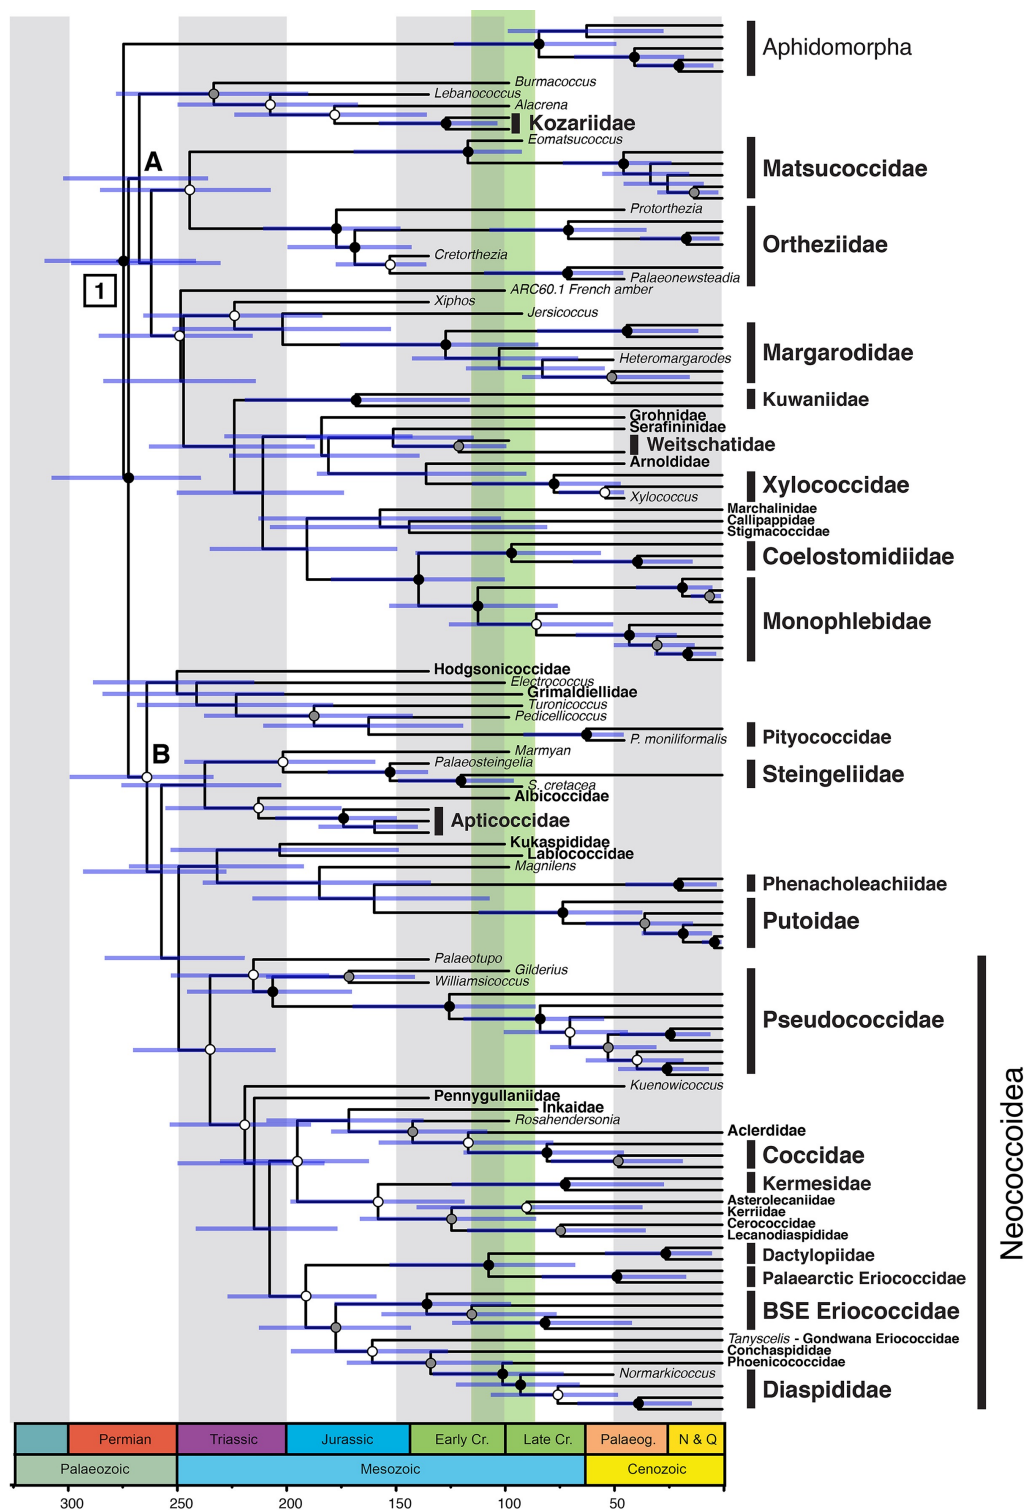

**Figure S2:** Divergence-time estimates based on a total-evidence approach (tip-dating) including Recent and fossil terminals, using MrBayes 3.2.3 from Ronquist et al., 2012 approach, all-compatibility summary. Posterior probability: black dot: 95-100% P; grey dot: 80-94%; white dots: 50-79%. Node number represents root node prior (Supplementary Table S3). Node letters are clades mentioned in the results. Green area: period of major angiosperm radiation.

(c) Posterior age plots and LTT Plots

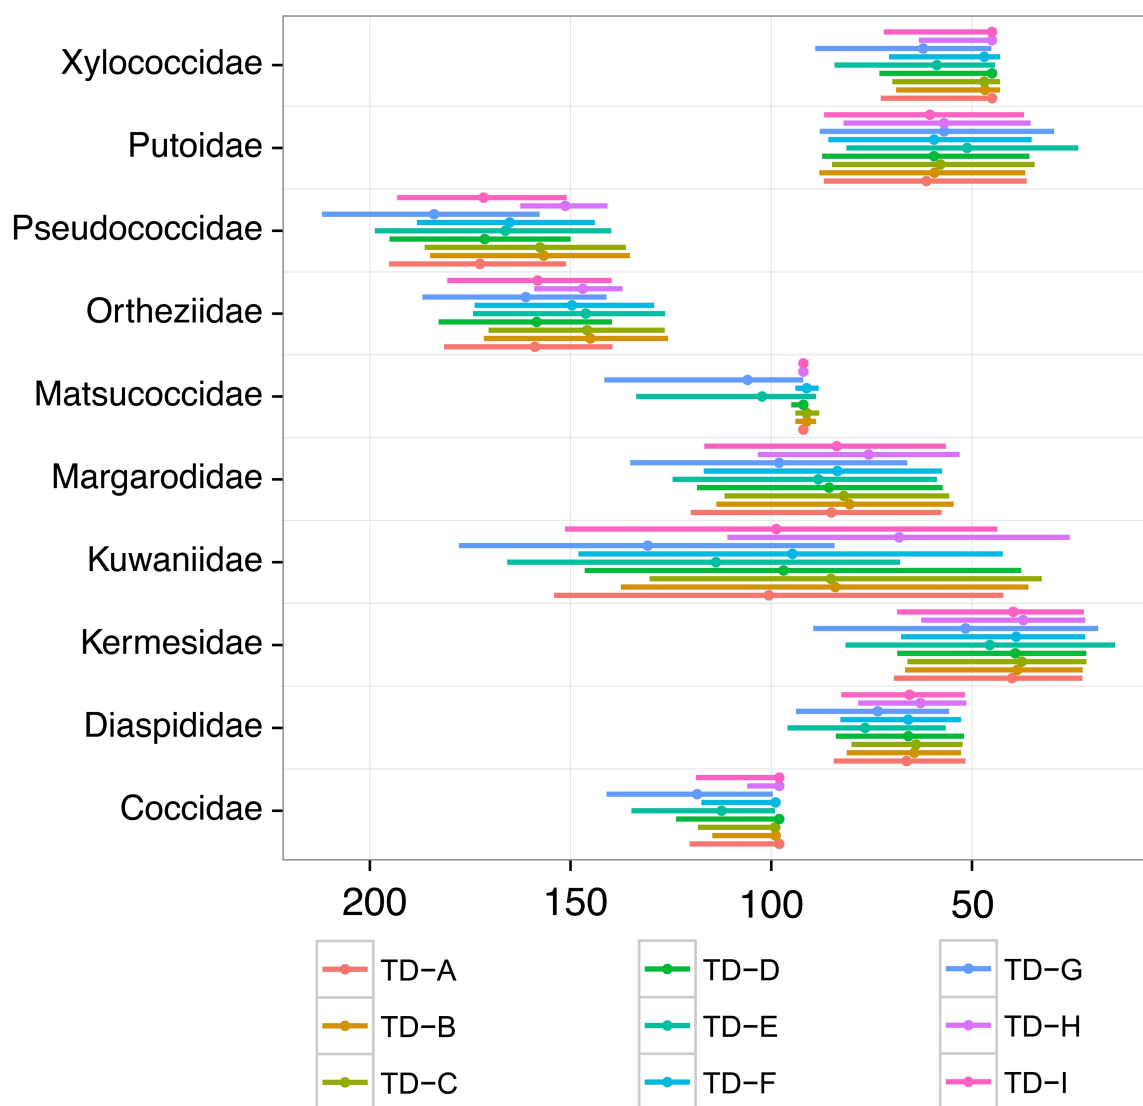

**Figure S3:** Comparison among tip-dating analyses of the posterior ages (median and 95 % HDP) for lineages with age priors used in the node-dating analysis. For the parameters used in each tip-dating analysis, refer to Table 1.

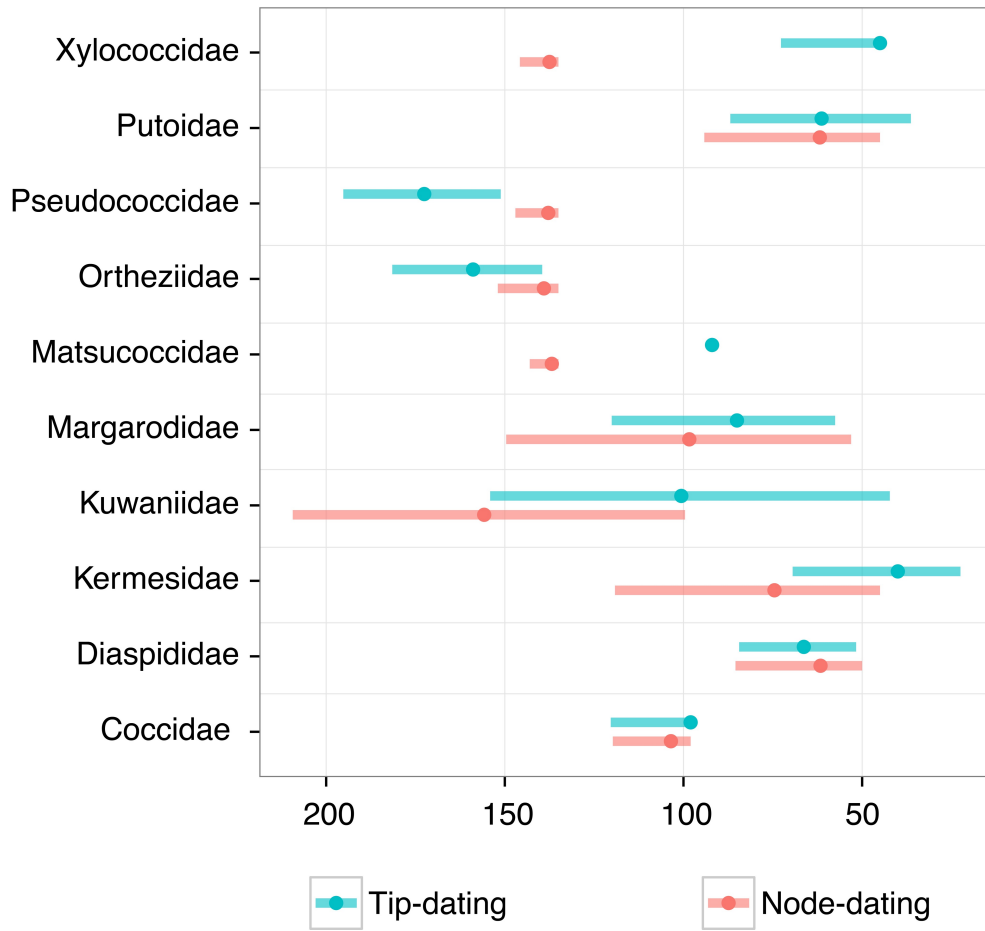

**Figure S4:** Comparison between node-dating and tip-dating approaches of the posterior ages (median) and 95% HDP for lineages with age priors used in the node-dating analysis.

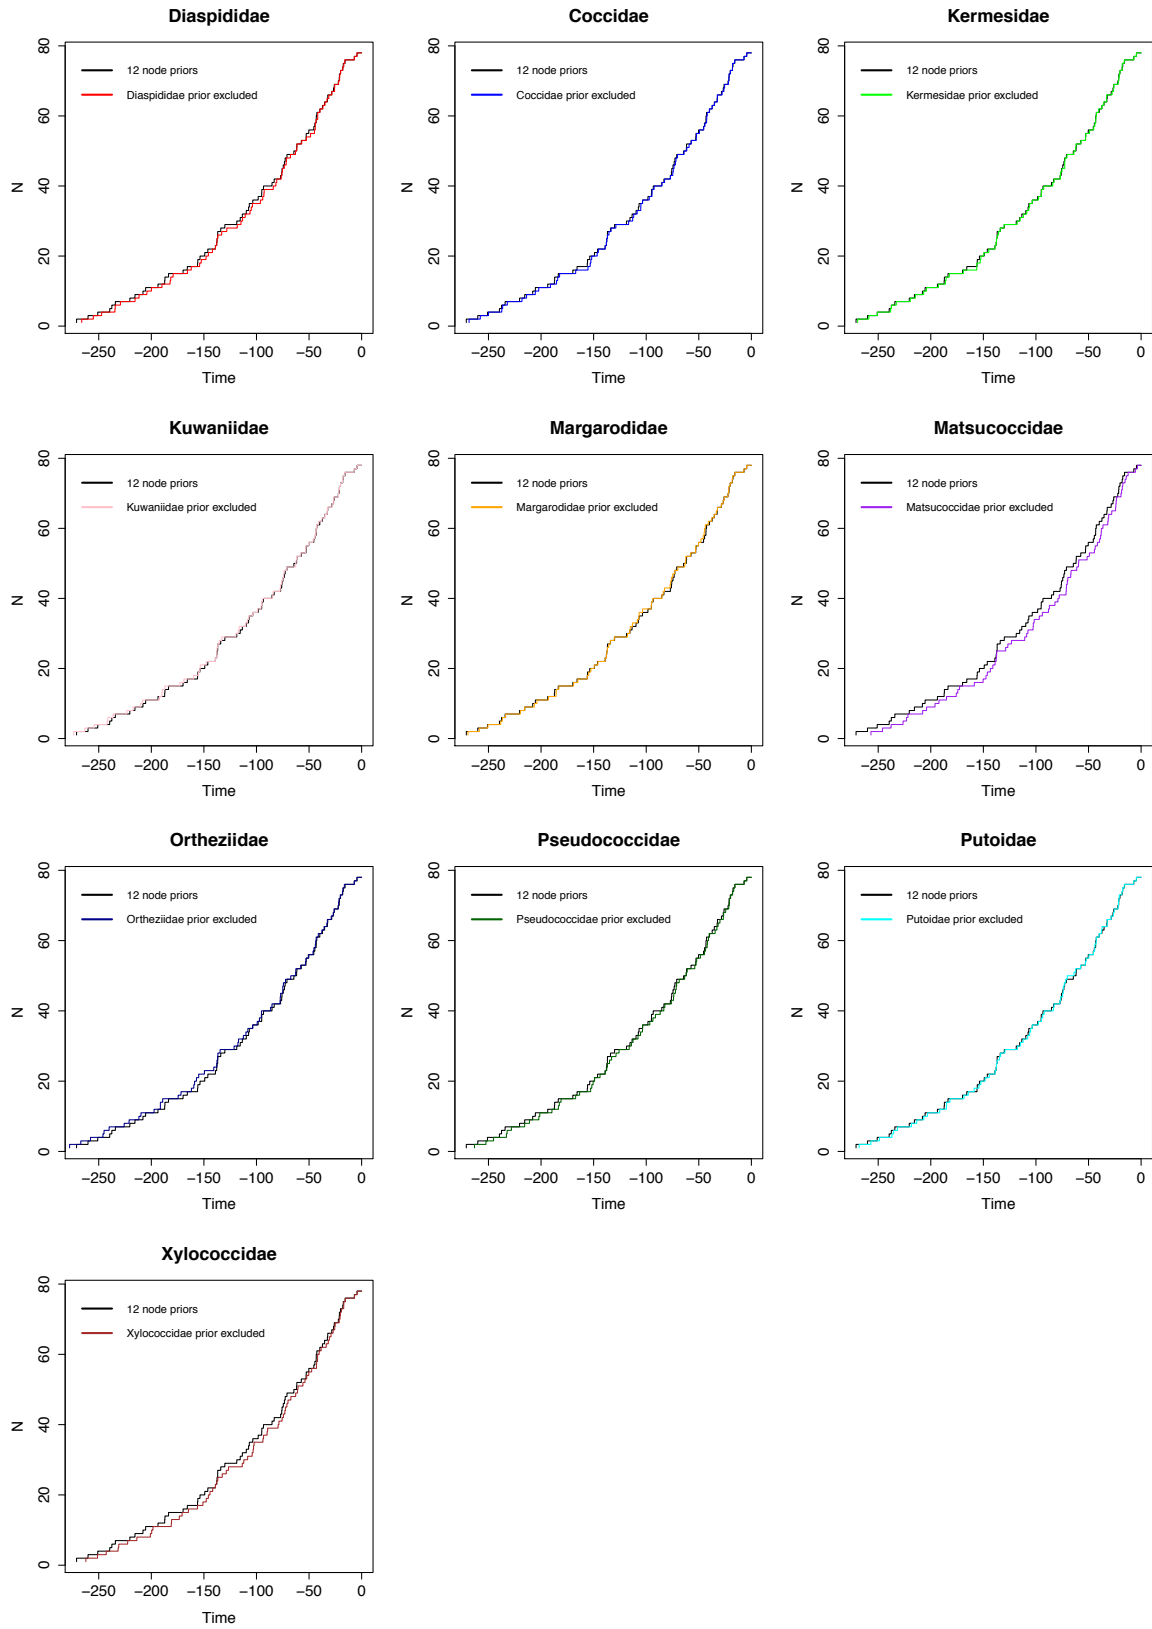

**Figure S5:** Effect on age estimates for the node-dating analyses when removing one of the node priors individually.

## References

1. Hardy, N. B., Gullan, P. J., Henderson, R. C. & Cook, L. G. 2008 Relationships among felt scale insects (Hemiptera: Coccoidea: Eriococcidae) of southern beech, *Nothofagus* (Nothofagaceae), with the first descriptions of Australian species of the *Nothofagus*-feeding genus *Madarococcus* Hoy. *Invert. Systematics* **22**, 365. (doi: 10.1071/IS07032)
2. Morse, G. E. & Normark, B. B. 2005 A molecular phylogenetic study of armoured scale insects (Hemiptera: Diaspididae). *Systematic Entomology* **31**, 338–349. (doi: 10.1111/j.1365-3113.2005.00316.x)
3. Downie, D. A. & Gullan, P. J. 2005 Phylogenetic congruence of mealybugs and their primary endosymbionts. *Journal of Evolutionary Biology* **18**, 315–324. (doi:10.1111/j.1420-9101.2004.00834.x)
4. Kearse, M. et al. 2012 Geneious Basic: an integrated and extendable desktop software platform for the organization and analysis of sequence data. *Bioinformatics* **28**, 1647–1649. (doi:10.1093/bioinformatics/bts199)
5. Katoh, K., Misawa, K., Kuma, K. I. & Miyata, T. 2002 MAFFT: a novel method for rapid multiple sequence alignment based on fast Fourier transform. *Nucleic Acids Research* **30**, 3059–3066. (doi:10.1093/nar/gkf436)
6. Darriba, D., Taboada, G. L., Doallo, R. & Posada, D. 2012 jModelTest 2: more models, new heuristics and parallel computing. *Nat Meth* **9**, 772–772. (doi:10.1038/nmeth.2109)
7. Dohlen, Von, C. D. & Moran, N. A. 1995 Molecular phylogeny of the Homoptera: a paraphyletic taxon. *Journal of Molecular Evolution* **41**, 211–223. (doi:10.1007/bf00170675)
8. Dietrich, C. 2001 Phylogeny of the major lineages of Membracoidea (Insecta: Hemiptera: Cicadomorpha) based on 28S rDNA sequences. *Molecular Phylogenetics and Evolution* **18**, 293–305. (doi:10.1006/mpev.2000.0873)
9. Cho, S., Mitchell, A., Regier, J. C., Mitter, C., Poole, R. W., Friedlander, T. P. & Zhao, S. 1995 A highly conserved nuclear gene for low-level phylogenetics: elongation factor-1 alpha recovers morphology-based tree for heliothine moths. *Molecular Biology and Evolution* **12**, 650–656.
10. Regier & C, J. 2007 Protocols, Concepts, and Reagents for preparing DNA sequencing templates. 1–34.
11. Veà, I. M. & Grimaldi, D. A. 2015 Diverse new scale insects (Hemiptera: Coccoidea) in amber from the Cretaceous and Eocene with a phylogenetic framework for fossil Coccoidea. *American Museum Novitates*, 1–80. (doi:10.1206/3823.1)
12. Miller, M. A., Pfeiffer, W. & Schwartz, T. 2010 Creating the CIPRES Science Gateway for inference of large phylogenetic trees. 1–8.

13. Ronquist, F., Klopstein, S., Vilhelmsen, L., Schulmeister, S., Murray, D. L. & Rasnitsyn, A. P. 2012 A total-evidence approach to dating with fossils, applied to the early radiation of the Hymenoptera. *Systematic Biology* **61**, 973–999. (doi:10.1093/sysbio/sys058)
14. Szwed, J. & Nel, A. 2011 The Oldest Aphid Insect from the Middle Triassic of the Vosges, France. *Acta Palaeontologica Polonica* **56**, 757–766. (doi:10.4202/app.2010.0034)
15. Koteja, J. 2000 Scale insects (Homoptera, Coccinea) from upper cretaceous New Jersey amber. In *Studies on fossils in amber, with particular reference to the Cretaceous of New Jersey* (ed D. A. Grimaldi), pp. 147–229. Leiden: Backhuys Publishers.
16. Koteja, J. 1988 *Sucinikermes kulickae* gen. et sp. n. (Homoptera, Coccinea) from Baltic amber. *Polskie Pismo Entomologiczne* **58**, 525–535.
17. Koteja, J. 2008 Xylococcidae and related groups (Hemiptera: Coccinea) from Baltic amber. **49**, 19–56.
18. Koteja, J. & Azar, D. 2008 Scale insects from lower cretaceous amber of Lebanon (Hemiptera: Sternorrhyncha: Coccinea). *Alavesia* **2**, 133–167.
19. Koteja, J. 1989 *Baisococcus victoriae* gen. et sp. n.—a Lower Cretaceous coccid (Homoptera, Coccinea). *Acta Zoologica Cracoviensia* **32**, 93–106.
20. R Core Team 2014 R: A language and environment for statistical computing.
